# Supplementary material
Source: PubMed Central journal article supplement (PMC4318798)
Supplement: NIHMS647098-supplement-2.pdf [file NIHMS647098-supplement-2.pdf]

## Supplementary Tables and References

**Supplementary Table 1.** Circular Dichroism analysis of Ctp1.

| <b>Ctp1</b> | <b><math>\alpha</math>-Helix (%)</b> | <b><math>\beta</math>-Sheet (%)</b> | <b>Disordered(%)</b> | <b>NRMSD*</b> |
|-------------|--------------------------------------|-------------------------------------|----------------------|---------------|
| Ctp1 1-294  | 53.3                                 | 6.1                                 | 55.9                 | 0.348         |
| Ctp1 1-60   | 89                                   | -1.4                                | 27.7                 | 0.428         |
| Ctp1 61-294 | 16.8                                 | 17.8                                | 65                   | 0.609         |

\*NRMSD, normalized root mean square deviation. Analysis performed using Selcon3 from the Dichroweb server <sup>1-3</sup>.

**Supplementary Table 2.** Ctp1 DNA binding substrates

| Figure Panel                             | Substrate                                                                            | Substrate name                    | Component oligos (sequences in Supp. Table 3) |
|------------------------------------------|--------------------------------------------------------------------------------------|-----------------------------------|-----------------------------------------------|
| 3b, Supp. Fig. 5a                        | 5 —                                                                                  | single-stranded*                  | ssDNA                                         |
| 3b, 3d, 3e, 4c, 4e, Supp. Fig. 5a, 5e, 7 | 5 = , 54 bp =                                                                        | double-stranded*                  | dsDNA                                         |
| 3b                                       | 5   | DNA bubble*                       | ssDNA/bubble                                  |
| 3b                                       | 5   | 3'-overhang*                      | ssDNA/3over                                   |
| 3b                                       | 5   | 3'- flap*                         | ssDNA/3flap                                   |
| 3b                                       | 5   | 5'- flap*                         | ssDNA/5flap                                   |
| 3b, 3d, 3e, Supp. Fig. 5a                | 5   | fork*                             | ssDNA/splay                                   |
| 3b, 3c                                   |  5 | hairpin <sup>§</sup>              | 44hp                                          |
| Supp. Fig. 5d                            | =<br>39 bp                                                                           | 39bp double-stranded <sup>¥</sup> | 39bpf/39bpr                                   |

\*DNA sequences adapted from Weston *et al.*, (2012)<sup>4</sup>.

§DNA sequence adapted from Lengsfeld, *et al.*, (2007)<sup>5</sup>.

¥DNA sequences from Tumbale *et al.*, (2011)<sup>6</sup>.

**Supplementary Table 3.** Ctp1 DNA binding substrate oligonucleotide sequences

| <b>Oligo Name</b> | <b>5' modification</b> | <b>Sequence</b>                                        | <b>3' modification</b> |
|-------------------|------------------------|--------------------------------------------------------|------------------------|
| ssDNA             |                        | GCAGGAGGTGGCGTCGGGTGGACGGGTGGATTGAAATTTAGGCTGGCACGGTCT | 6-FAM                  |
| dsDNA             |                        | AGACCGTGCCAGCCTAAATTTCAATCCACCCGTCCACCCGACGCCACCTCCTGC |                        |
| bubble            |                        | AGACCGTGCCAGCCATTGGAGTTTCCACCCGTCCACCCGACGCCACCTCCTGC  |                        |
| 3over             |                        | TCCACCCGTCCACCCGACGCCACCTCCTG                          |                        |
| 3flap             |                        | ACAACGACTAGAGTTAGTCGAGACCT                             |                        |
| 5flap             |                        | CCCGTCCACCCGACGCCACCTCCTGC                             |                        |
| splay             |                        | AGACCGTGCCAGCCTAAATTTCAATCCAAGGTCTCGACTAACTCTAGTCGTTGT |                        |
| 44hp              | 6-FAM                  | CACAGCGTACAGGTAATGCTCTGTACGCTTGTGGTCGATCTGG            |                        |
| 39bpf             | 6-FAM                  | CAGAGTCATAATATGCAGGTGCAGGTTATTCATGCTCGG                |                        |
| 39bpr             |                        | CCGAGCATGAATAACCTGCACCTGCATATTATGACTCTG                |                        |

**Supplementary Table 4.** *Schizosaccharomyces pombe* strains used in this study.

| Strain | Genotype                                                                                    | Source or reference |
|--------|---------------------------------------------------------------------------------------------|---------------------|
| PR109  | <i>h<sup>-</sup> leu1-32 ura4-D18</i>                                                       | Ref.7               |
| PR110  | <i>h<sup>+</sup> leu1-32 ura4-D18</i>                                                       | Ref.7               |
| WL137  | <i>h<sup>-</sup> leu1-32 ura4-D18 ctp1::kanMX6</i>                                          | This study          |
| SA00A  | <i>h<sup>-</sup> leu1-32 ura4-D18 ctp1-5flag:hphMX6</i>                                     | This study          |
| SA00B  | <i>h<sup>+</sup> leu1-32 ura4-D18 ctp1-5flag:hphMX6</i>                                     | This study          |
| SA001  | <i>h<sup>+</sup> leu1-32 ura4-D18 ctp1-R273A-5flag:hphMX6</i>                               | This study          |
| SA006  | <i>h<sup>+</sup> leu1-32 ura4-D18 ctp1-H274A-5flag:hphMX6</i>                               | This study          |
| SA005  | <i>h<sup>+</sup> leu1-32 ura4-D18 ctp-R275A-5flag:hphMX6</i>                                | This study          |
| SA029  | <i>h<sup>+</sup> leu1-32 ura4-D18 ctp1-R273A-5flag:hphMX6 rad22-YFP:natMX6 his3?</i>        | This study          |
| SA031  | <i>h<sup>+</sup> leu1-32 ura4-D18 ctp1-H274A-5flag:hphMX6 rad22-YFP:natMX6 his3?</i>        | This study          |
| SA033  | <i>h<sup>-</sup> leu1-32 ura4-D18 ctp-R275A-5flag:hphMX6 rad22-YFP:natMX6 his3?</i>         | This study          |
| SA039  | <i>h<sup>+</sup> leu1-32 ura4-D18 ctp1-5flag:hphMX6 rad22-YFP:natMX6 his3?</i>              | This study          |
| SA043  | <i>h<sup>+</sup> leu1-32 ura4-D18 ctp1::kanMX6 rad22-YFP:natMX6 his3?</i>                   | This study          |
| SA052  | <i>h<sup>-</sup> leu1-32 ura4-D18 ctp1-R32A-5flag:hphMX6</i>                                | This study          |
| SA058  | <i>h<sup>+</sup> leu1-32 ura4-D18 ctp1-K41A-5flag:hphMX6</i>                                | This study          |
| SA061  | <i>h<sup>+</sup> leu1-32 ura4-D18 ctp1-R32A-K41A-5flag:hphMX6</i>                           | This study          |
| SA062  | <i>h<sup>-</sup> leu1-32 ura4-D18 ctp1-R32A-5flag:hphMX6 rad22-YFP:natMX6 his3?</i>         | This study          |
| SA063  | <i>h<sup>+</sup> leu1-32 ura4-D18 ctp1-K41A-5flag:hphMX6 rad22-YFP:natMX6 his3?</i>         | This study          |
| SA064  | <i>h<sup>-</sup> leu1-32 ura4-D18 ctp1-R32A-K41A-5flag:hphMX6 rad22-YFP:natMX6 his3?</i>    | This study          |
| SA074  | <i>h<sup>+</sup> leu1-32 ura4-D18 ctp1-ΔN60-5flag:hphMX6</i>                                | This study          |
| SA088  | <i>h<sup>-</sup> leu1-32 ura4-D18 ctp1-ΔN60-5flag:hphMX6 exo1::ura4+ pku80::natMX6</i>      | This study          |
| SA092  | <i>h<sup>+</sup> leu1-32 ura4-D18 ctp1-ΔN60-5flag:hphMX6 pku80::natMX6</i>                  | This study          |
| SA098  | <i>h<sup>-</sup> leu1-32 ura4-D18 ctp1-ΔN60-5flag:hphMX6 exo1::ura4+</i>                    | This study          |
| JW146  | <i>h<sup>-</sup> leu1-32 ura4-D18 pku80::natMX6</i>                                         | This study          |
| JW152  | <i>h<sup>-</sup> leu1-32 ura4-D18 ctp1::kanMX6 pku80::natMX6 ade6?</i>                      | This study          |
| JW158  | <i>h<sup>-</sup> leu1-32 ura4-D18 ctp1-R32A-K41A-5flag:hphMX6 pku80::natMX6</i>             | This study          |
| JW160  | <i>h<sup>-</sup> leu1-32 exo1::ura4+</i>                                                    | This study          |
| JW162  | <i>h<sup>-</sup> leu1-32 exo1::ura4+ pku80::natMX6</i>                                      | This study          |
| JW166  | <i>h<sup>-</sup> leu1-32 ura4-D18 ctp1-5flag:hphMX6 exo1::ura4+</i>                         | This study          |
| JW169  | <i>h<sup>-</sup> leu1-32 ura4-D18 ctp1-5flag:hphMX6 pku80::natMX6</i>                       | This study          |
| JW171  | <i>h<sup>-</sup> leu1-32 ura4-D18 ctp1-R32A-K41A-5flag:hphMX6 exo1::ura4+</i>               | This study          |
| JW174  | <i>h<sup>-</sup> leu1-32 ura4-D18 ctp1-R275A-5flag:hphMX6 exo1::ura4+</i>                   | This study          |
| JW177  | <i>h<sup>+</sup> leu1-32 ura4-D18 ctp1-R275A-5flag:hphMX6 pku80::natMX6</i>                 | This study          |
| JW186  | <i>h<sup>-</sup> leu1-32 ura4-D18 ctp1::kanMX6 exo1::ura4+ ade6?</i>                        | This study          |
| JW187  | <i>h<sup>-</sup> leu1-32 ura4-D18 ctp1-R32A-K41A-5flag:hphMX6 exo1::ura4+ pku80::natMX6</i> | This study          |
| JW190  | <i>h<sup>+</sup> leu1-32 ura4-D18 ctp1::natMX6 exo1::ura4+ pku80::hphMX6 ade6?</i>          | This study          |
| JW194  | <i>h<sup>-</sup> leu1-32 ura4-D18 ctp1-5flag:hphMX6 exo1::ura4+ pku80::natMX6</i>           | This study          |
| JW196  | <i>h<sup>2</sup> leu1-32 ura4-D18 ctp1-R275A-5flag:hphMX6 exo1::ura4+ pku80::natMX6</i>     | This study          |

## Supplementary References

1. Sreerama, N. & Woody, R.W. A self-consistent method for the analysis of protein secondary structure from circular dichroism. *Anal. Biochem.* **209**, 32-44 (1993).
2. Sreerama, N., Venyaminov, S.Y. & Woody, R.W. Estimation of the number of alpha-helical and beta-strand segments in proteins using circular dichroism spectroscopy. *Protein Sci.* **8**, 370-80 (1999).
3. Whitmore, L. & Wallace, B.A. DICHROWEB, an online server for protein secondary structure analyses from circular dichroism spectroscopic data. *Nucleic Acids Res.* **32**, W668-73 (2004).
4. Weston, R., Peeters, H. & Ahel, D. ZRANB3 is a structure-specific ATP-dependent endonuclease involved in replication stress response. *Gene. Dev.* **26**, 1558-72 (2012).
5. Lengsfeld, B.M., Rattray, A.J., Bhaskara, V., Ghirlando, R. & Paull, T.T. Sae2 is an endonuclease that processes hairpin DNA cooperatively with the Mre11/Rad50/Xrs2 complex. *Mol. Cell* **28**, 638-51 (2007).
6. Tumbale, P. *et al.* Structure of an aprataxin-DNA complex with insights into AOA1 neurodegenerative disease. *Nat. Struct. Mol. Biol.* **18**, 1189-95 (2011).
7. Williams, R.S. *et al.* Nbs1 flexibly tethers Ctp1 and Mre11-Rad50 to coordinate DNA double-strand break processing and repair. *Cell* **139**, 87-99 (2009).
