# Supplementary material
Source: PubMed Central journal article supplement (PMC4318798)

# Supplementary Data Set 1

## Figure 1

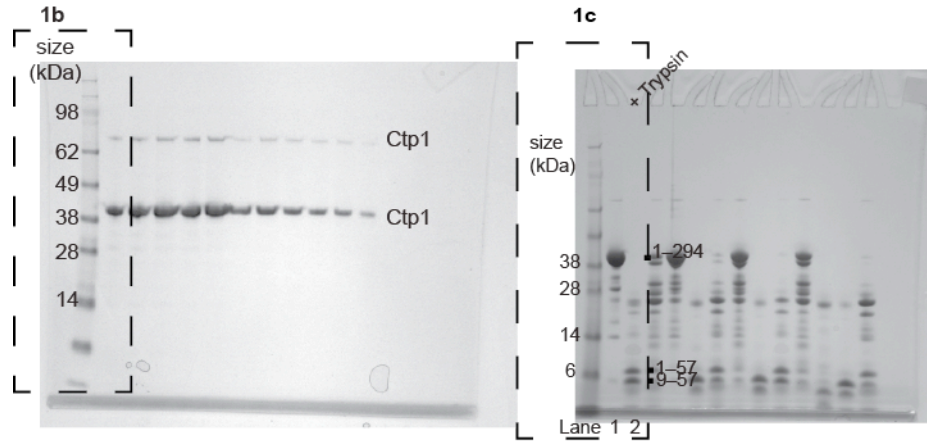

## Figure 3

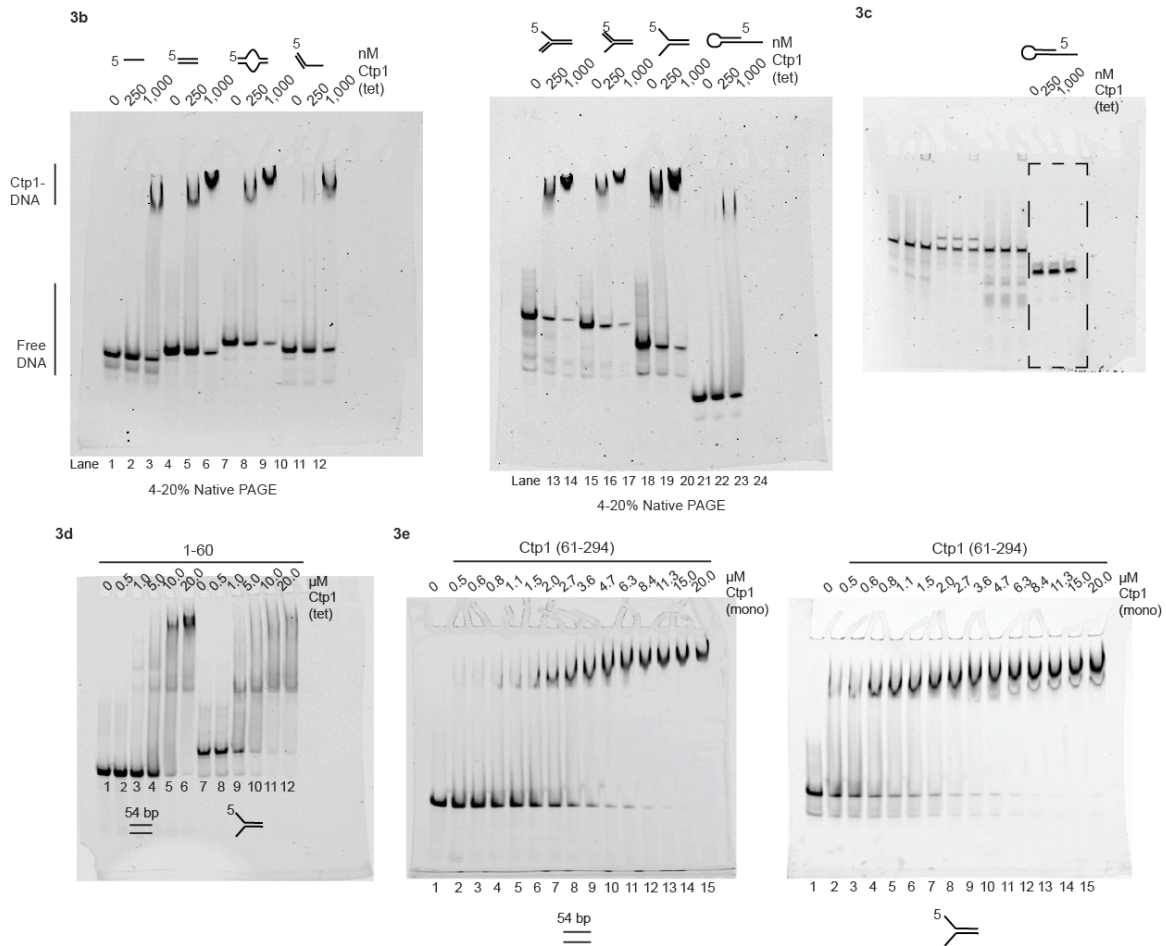

**Figure 4**

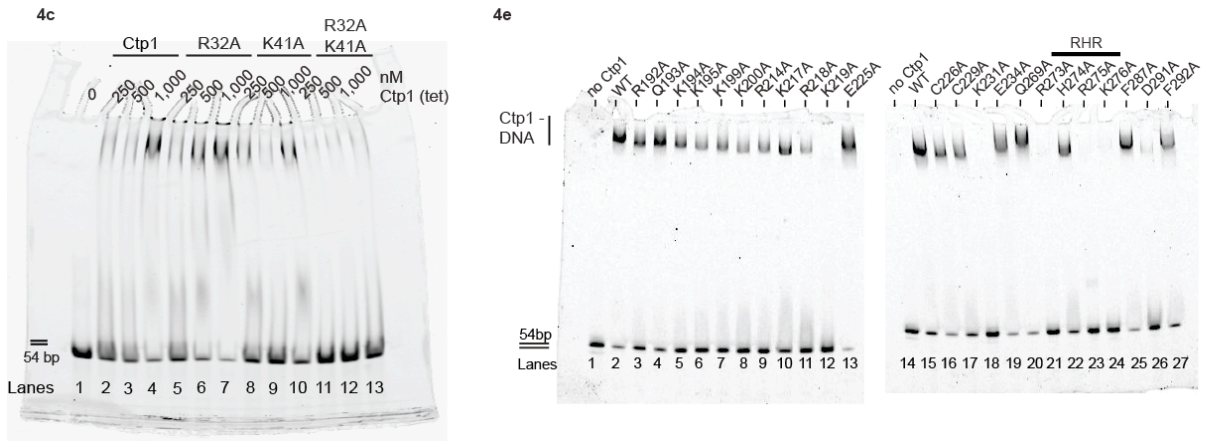

**Figure 5**

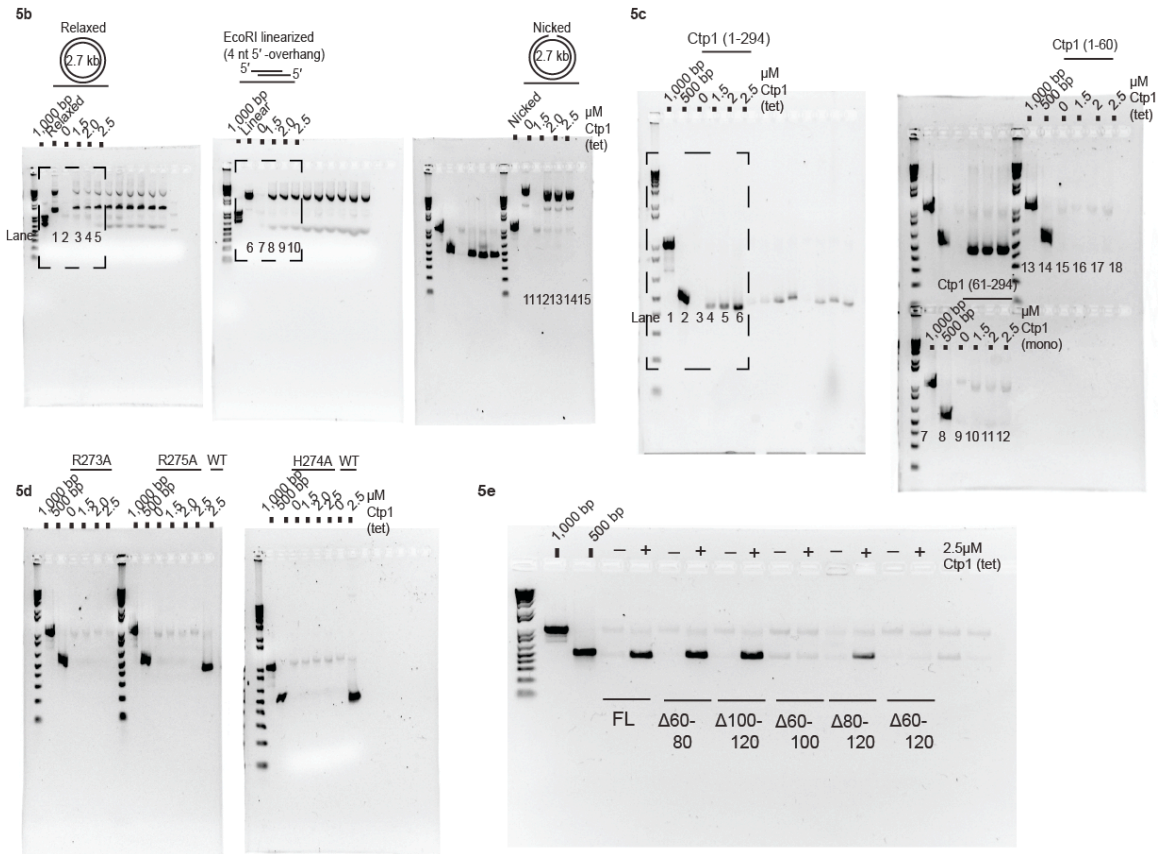

Supplement: NIHMS647098-supplement-3.pdf [file NIHMS647098-supplement-3.pdf]
